# Supplementary material for: Outcome After Mitral Valve Repair Or Replacement For Non-Ischemic Mitral Regurgitation: A System Review And Meta-Analysis
Source: Research Square preprint supplement (doi:10.21203/rs.3.rs-371356/v1), 2021-05-10
Supplement: Supplementary file [file 77c889516168241addd6aea8.pdf]

**A**

| Study or Subgroup | MVR  |      |       | MVr  |      |       | Weight | Mean Difference   |                   |
|-------------------|------|------|-------|------|------|-------|--------|-------------------|-------------------|
|                   | Mean | SD   | Total | Mean | SD   | Total |        | IV, Fixed, 95% CI | IV, Fixed, 95% CI |
| DiGregorio 2004   | 63   | 12   | 13    | 63   | 9    | 46    | 0.1%   | 0.00              | [-7.02, 7.02]     |
| Gonçalo 2015      | 61.1 | 13   | 26    | 63.5 | 10.9 | 475   | 0.1%   | -2.40             | [-7.49, 2.69]     |
| Helder 2014       | 56   | 8    | 21    | 60   | 7    | 40    | 0.2%   | -4.00             | [-8.05, 0.05]     |
| Hendrix 2019      | 60   | 5    | 3520  | 60   | 5    | 8523  | 97.3%  | 0.00              | [-0.20, 0.20]     |
| Lazam 2017        | 66   | 9    | 213   | 64   | 10   | 1709  | 2.2%   | 2.00              | [0.70, 3.30]      |
| Pandis 2011       | 62.3 | 13.3 | 19    | 58.1 | 10.8 | 21    | 0.1%   | 4.20              | [-3.36, 11.76]    |

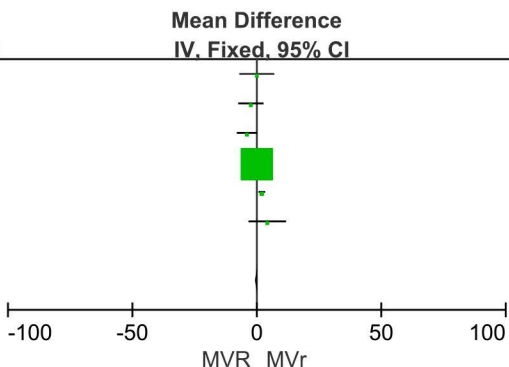

**Total (95% CI)** 3812 10814 100.0% 0.03 [-0.16, 0.23]

Heterogeneity:  $\text{Chi}^2 = 14.78$ ,  $\text{df} = 5$  ( $P = 0.01$ );  $I^2 = 66\%$

Test for overall effect:  $Z = 0.35$  ( $P = 0.73$ )

**B**

| Study or Subgroup | MVR    |       | MVr    |       | Weight | Odds Ratio         |                    |
|-------------------|--------|-------|--------|-------|--------|--------------------|--------------------|
|                   | Events | Total | Events | Total |        | M-H, Fixed, 95% CI | M-H, Fixed, 95% CI |
| Bozbuga 2003      | 2      | 3     | 3      | 3     | 0.5%   | 0.24               | [0.01, 8.62]       |
| DiGregorio 2004   | 10     | 13    | 37     | 46    | 1.5%   | 0.81               | [0.18, 3.57]       |
| Gillinov 2003     | 81     | 232   | 170    | 447   | 30.4%  | 0.87               | [0.63, 1.22]       |
| Gonçalo 2015      | 22     | 26    | 231    | 475   | 1.5%   | 5.81               | [1.97, 17.11]      |
| Gramalia 1999     | 63     | 63    | 55     | 62    | 0.2%   | 17.16              | [0.96, 307.35]     |
| Hata 2019         | 46     | 85    | 39     | 85    | 7.2%   | 1.39               | [0.76, 2.54]       |
| Helder 2014       | 19     | 21    | 39     | 40    | 1.0%   | 0.24               | [0.02, 2.86]       |
| Lazam 2017        | 83     | 213   | 581    | 1709  | 31.6%  | 1.24               | [0.92, 1.66]       |
| Lee 1997          | 72     | 111   | 120    | 167   | 13.5%  | 0.72               | [0.43, 1.21]       |
| Zalaquett 2005    | 14     | 28    | 55     | 88    | 5.3%   | 0.60               | [0.25, 1.41]       |
| Zhou 2010         | 37     | 78    | 69     | 241   | 7.1%   | 2.25               | [1.33, 3.80]       |

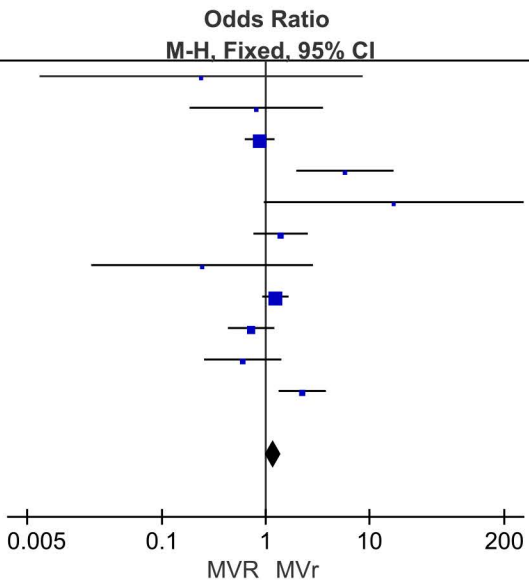

**Total (95% CI)** 873 3363 100.0% 1.18 [1.00, 1.40]

Total events 449 1399

Heterogeneity:  $\text{Chi}^2 = 29.49$ ,  $\text{df} = 10$  ( $P = 0.001$ );  $I^2 = 66\%$

Test for overall effect:  $Z = 1.94$  ( $P = 0.05$ )

**C**

| Study or Subgroup | MVR    |       | MVr    |       | Weight | Odds Ratio         |                    |
|-------------------|--------|-------|--------|-------|--------|--------------------|--------------------|
|                   | Events | Total | Events | Total |        | M-H, Fixed, 95% CI | M-H, Fixed, 95% CI |
| Gonçalo 2015      | 6      | 26    | 33     | 475   | 2.7%   | 4.02               | [1.51, 10.69]      |
| Shafii 2012       | 15     | 30    | 9      | 42    | 3.9%   | 3.67               | [1.31, 10.24]      |
| Vassileva 2011    | 348    | 1036  | 83     | 219   | 93.4%  | 0.83               | [0.61, 1.12]       |

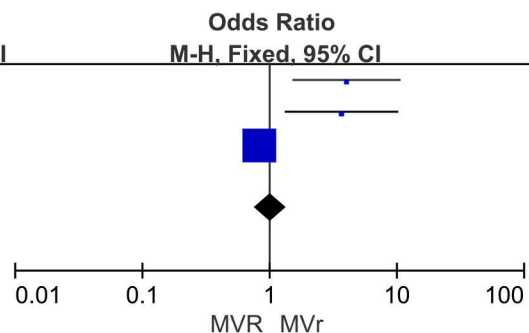

**Total (95% CI)** 1092 736 100.0% 1.02 [0.77, 1.35]

Total events 369 125

Heterogeneity:  $\text{Chi}^2 = 15.31$ ,  $\text{df} = 2$  ( $P = 0.0005$ );  $I^2 = 87\%$

Test for overall effect:  $Z = 0.17$  ( $P = 0.87$ )
